# Supplementary material for: Histological Identification and Quantification of Eosinophils and Ascites in Leghorn Chickens Treated with High Oral Concentrations of NaCl–Pilot Study
Source: MDPI journal article supplement (doi:10.3390/toxics10070381), 2022-07-09
Supplement: s1 [file s1]

# Supplementary Materials: Histological Identification and Quantification of Eosinophils and Ascites in Leghorn Chickens Treated with High Oral Concentrations of NaCl–Pilot Study

Victor M. Petrone-Garcia, Inkar Alejandro Castellanos-Huerta, Saeed El-Ashram, Marco A. Juárez-Estrada, Benjamin Fuente-Martínez, Danielle B. Graham, and Guillermo Tellez-Isaias

**Table S1.** Ingredient composition (kg) and nutrient contents of feed supplied to the experimental SPF chickens.

| Ingredients                                                                       | Inclusion (kg) |
|-----------------------------------------------------------------------------------|----------------|
| Yellow corn 7.1%                                                                  | 622.62         |
| Soybean meal 46.5%                                                                | 323            |
| Limestone 38% Ca                                                                  | 18             |
| Phosphate 21/27%                                                                  | 12             |
| Vegetable oil                                                                     | 10             |
| NaCl (refined salt)                                                               | 4              |
| Vitamin premix (Laying chicken GT V1, Trouw Nutrition, Zapopan, Jal., Mexico)     | 1.4            |
| Mineral premix [6]                                                                | 1.1            |
| DL-Methionine 99% (MetAMINO®, Evonik, Essen, Germany)                             | 3.700          |
| Liquid L-lysine 50% (ADM, Chicago, IL, USA)                                       | 3.500          |
| L-Threonine (ThreAMINO®, Evonik, Essen, Germany)                                  | 0.640          |
| 6-Phytase (Aextra PHY TPT 10000®, DuPont Industrial Biosciences, Marlborough, UK) | 0.045          |
| Nutrients                                                                         |                |
| Weight                                                                            | 1.0            |
| Dry matter (%)                                                                    | 88.300         |
| Crude protein (%)                                                                 | 20.000         |
| Metabolizable energy (Mcal kg <sup>-1</sup> )                                     | 3.087          |
| Choline (mg kg <sup>-1</sup> )                                                    | 2.000          |
| Arginine (%)                                                                      | 1.210          |
| Linoleic acid (%)                                                                 | 1.200          |
| Total lysine (%)                                                                  | 1.150          |
| Total calcium (%)                                                                 | 1.050          |
| Methionine + cystine (%)                                                          | 0.830          |
| Valine (%)                                                                        | 0.830          |
| Total Threonine (%)                                                               | 0.820          |
| Isoleucine (%)                                                                    | 0.790          |
| Total methionine (%)                                                              | 0.510          |
| Phosphorus available (%)                                                          | 0.480          |
| Digestible phosphorus (%)                                                         | 0.440          |
| Total tryptophan (%)                                                              | 0.210          |
| Total chlorine (%)                                                                | 0.200          |
| Total sodium (%)                                                                  | 0.200          |
